# Supplementary material for: Induction of Exocytosis Rescues Lysosomal GM2 Accumulation in Tay-Sachs Disease
Source: Hindawi journal article supplement (doi:10.1155/2024/4047025), 2024-03-19
Supplement: f1 [file 4047025.f1.docx]

| **A**  **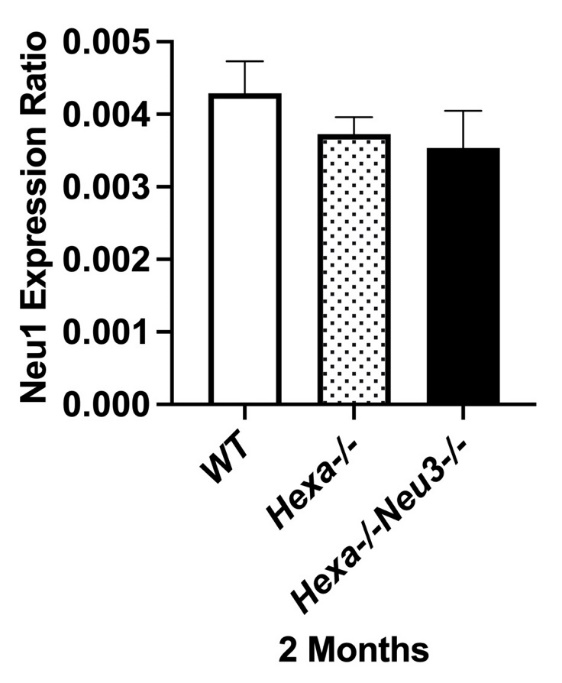** | **B**  **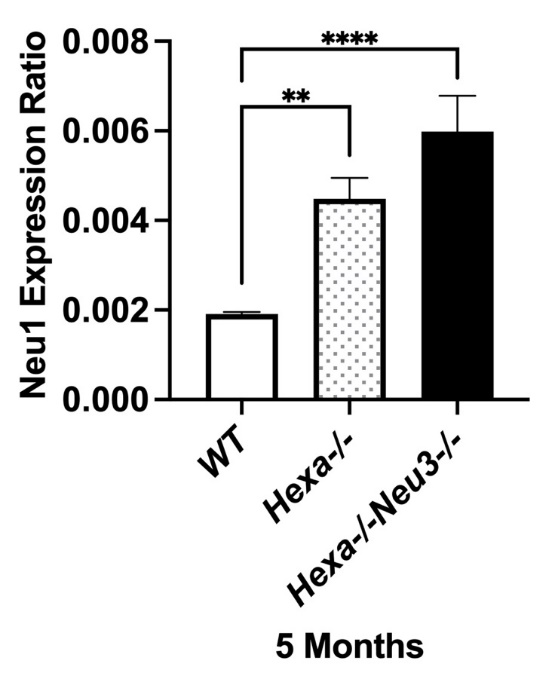** | |
| --- | --- | --- |
| **C**  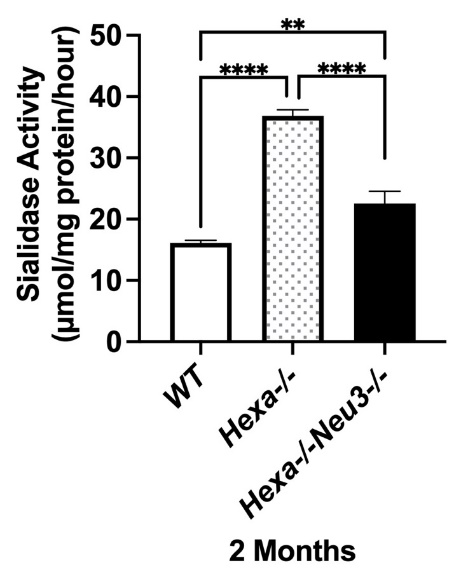 | | **D**  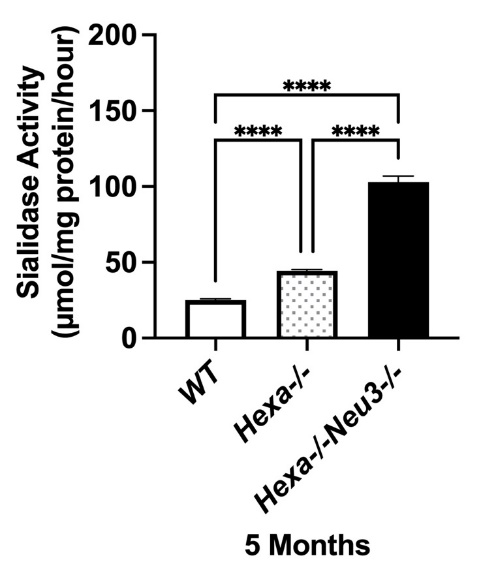 |

**Figure S1:** Neu1 gene expression (A and B) and specific Neu1 activity ( C and D) in brains of 2 and 5 months *WT, Hexa-/- and Hexa-/-Neu3-/-*. Expression ratios were calculated by ΔCT method, and percent ratios were represented. One-way ANOVA analysis was used to determine p-values via GraphPad. Data are reported as mean ± SEM (n=3; **p<0,025, ***p<0,01, **** p< 0.0001).
